# Supplementary material for: Comparative analysis of knowledge, attitudes, and breast cancer screening practices among women in South Africa and the United States: a multinational study
Source: Research Square preprint supplement (doi:10.21203/rs.3.rs-9151807/v1), 2026-04-25
Supplement: Supplementary file 2 [file 320a0c42cd8f65db33cd3309.docx]

**Appendix 2 (SA KAP questionnaire )**

**Breast cancer KAP South Africa**

Make sure that the screening questions are in English for the country of field South Africa.

If you have questions, contact your Ipsos Researcher.

DO NOT use the survey for collecting personally identifiable data from respondents, such as full name, email address, phone number, physical residential address, postal code, etc.

For special / sensitive categories of data collected (racial/ethnic origin, political opinions, religious/philosophical beliefs, health, sex life/sexual orientation, trade union membership, genetic data, biometric data, financial info etc.) the following are required for custom questions: a special survey disclaimer (privacy notice), informed and explicit consent for collecting and processing such data and adding “Prefer not to answer” option for each sensitive question.

For all Healthcare projects, Ipsos is legally bound to carry out Adverse Event Reporting. If your Healthcare project includes an open end where a suspected Adverse Event may be reported, you must ensure the appropriate consent screeners are included in the survey. If your research project is healthcare related or if it collects special /sensitive categories of data, as described above, please liaise with your assigned Ipsos researcher; in case you don’t have any, click on the “Need help from a Researcher?” option on the page.

**DEMOGRAPHIC QUESTIONS**

Q1 What was the highest level of education you completed?

Literate but no formal school

Some primary school

Primary School Completed

Some high school

High school completed

Artisans certificate, technical / secretarial qualification obtained

Technikon diploma/degree completed

University degree completed

Post graduate degree completed

Q2 Employment status of the respondent

Employed full-time

Employed part-time

Self employed

Unemployed, but looking for a job

Unemployed and not looking for a job/Long-term sick or disabled

Full-time parent, homemaker

Retired

Student/Pupil

Q3 What is your marital status?

Never married

Married

Widowed

Divorced

Separated

Q4 Social grade computed variable - LSM

LSM 1 (Less than -1.390140 )

LSM 2 (Between -1.390140 to -1.242001 )

LSM 3 (Between -1.242000 to -1.011801)

LSM 4 (Between -1.011800 to -0.691001)

LSM 5 (Between -0.691000 to -0.278001)

LSM 6 (Between -0.278000 to 0.381999)

LSM 7 (Between 0.382000 to 0.800999)

LSM 8 (Between 0.801000 to 1.168999)

LSM 9 (Between 1.169000 to 1.744999)

LSM 10 (More than 1.744999)

This question is not visible to respondents. The answers to this question are computed based on the responses given to other question(s) that respondents will see in the data collection survey.

I am conducting a research study about breast cancer awareness and screening practices among women. This should take you about 20-30 minutes of your time. Participation is voluntary. You can withdraw at any time.

Q5 Where do you live?

Metropolitan municipality

Secondary City

Large Town

Small Town

Rural Municipality

This question is not visible to respondents. The answers to this question are computed based on the responses given to other question(s) that respondents will see in the data collection survey.

**Target selection questions**

Your study will be conducted in **South Africa** among **females, aged 35 - 70.**
Requested quotas on **age**, **gender**.

Please note that all the questions that define your audience (age, gender, region and target screening criteria) will be automatically set in a pre-screening process and will be available in the data reports - **No** need to add them to your questionnaire.

Make sure to add your inputs for survey questions in **English** for the country of field **South Africa**.
**Info:** There is **NO** automatic translation.
What you enter here is how the participants will see it in your survey.

Q1 What is your current age?

**Slider**

35 (Min) 71 (Max)

Min/max values: 35/71

Q2 Parity (number of children)

no children

1-2

3-4

5 and more

Q3 Did you breastfeed your children?

Single answer

Yes

No

Not applicable

Q4 Do you have a family history of breast cancer? (parents, grandparents, children or immediate relatives)

Yes

No/Do not know

Q5 Do you know anyone (friends or community members or colleagues) who have or has breast cancer?

Yes

No/Do not know

Q6 We would like to know how good or bad your health is TODAY using a scale from 0 to 100. Where 100 means the best health you can imagine, and 0 means the worst health you can imagine

**Slider**

0 (Worst health you can imagine [0 to 49]) 100 (Best health you can imagine [50 to 100])

Min/max values: 0/100

Q7 Please indicate the ONE response that best describes your mental health TODAY

I am not anxious or depressed

I am slightly anxious or depressed

I am moderately anxious or depressed

I am severely anxious or depressed

I am extremely anxious or depressed

Q8 Do you know how to access clinical breast examinations in your community?

Yes

No

Q9 Do you know how to access screening mammography for breast cancer in your community?

Yes

No

Q10 Have you ever been diagnosed with breast cancer?

Yes

No

Q11 If yes, what was the stage of the breast cancer at diagnosis?

Stage 0

Stage I

Stage II

Stage III

Stage IV

I don’t know

Not applicable

Q12 If yes, what was your age at diagnosis of breast cancer (in years)?

18 – 29 years

30 – 39 years

40 – 49 years

50 – 65 years

Older than 65 years

Not applicable

Q13 Do you think there is stigma associated with breast cancer in your community?

Yes

No/Do not know

**Section B: Breast Cancer Knowledge Survey**

**Instructions:** This survey asks questions about breast cancer. Please answer as best you can. Choose one answer unless stated otherwise. Your answers will help us understand what women know and where more education is needed.

**Questions on General Knowledge**

Q14 Breast cancer is the most common cancer among women.

True

False

Q15 Only women over the age of 50 can get breast cancer.

True

False

**Questions on Risk Factors**
Q16. Which of the following can increase a woman’s risk of breast cancer? [**Multiple answers**]

A. Family history of breast cancer

B. Smoking

C. Being overweight

D. Using birth control pills

E. Evil spirits or curses

F. A, B and C

Q17 A woman’s risk of breast cancer increases with age

True

False

**Questions on Symptoms**

Q18 Which of the following can be signs of breast cancer? [**Multiple answers**]

- A lump in the breast or armpit
- Nipple discharge or bleeding
- Dimpling or puckering of the skin
- All of the above

Q19 Breast cancer always causes pain in the early stages

True

False

Q20 **Questions on Screening and Detection**
What is the purpose of a screening mammogram?

- To guide the treatment planning for breast cancer
- To detect breast cancer early before any symptoms appear
- To remove a lump

Q21 How often should women aged 40 and older have a mammogram?

- Every year
- Every 5 years
- Only when they feel pain

Q22 Can breast self-exams help detect breast cancer early?

Yes

No

**Questions for Beliefs and Myths of Breast Cancer**

Q23 Breast cancer can be spread from one person to another.

True

False

Q24 Only women with a family history of breast cancer will get it.

True

False

Q25 Natural (herbal) medicine or prayer alone can cure breast cancer.

True

False

Q26 What is your main source of breast cancer information? (Indicate only one response)

- Media or social media (radio, television, newspaper, magazine, TikTok, Facebook, podcast)
- Family, friends, colleagues
- Healthcare professionals
- Faith-based organisations
- Community-based communications (health fairs, community events, posters, pamphlets)
- Natural medicine practitioner or herbalist
- Cancer organisations (Breast Cancer Foundation)
- I do not usually get information on breast cancer

Q27 **SECTION C : Attitudes to breast cancer**
From the following statements on attitudes to breast cancer, please indicate only one response

| **S/N** | **From the following statements on attitude to breast cancer, please indicate only one response** | **Strongly agree** | **Agree** | **Neutral** | **Disagree** | **Strongly disagree** |
| --- | --- | --- | --- | --- | --- | --- |
| **1** | **2** | **3** | **4** | **5** |
| 1 | I was very afraid that I would get breast cancer. |  |  |  |  |  |
| 2 | Any adult woman including me can develop breast cancer. |  |  |  |  |  |
| 3 | Breast cancer is a disease for elderly women only. |  |  |  |  |  |
| 4 | I would rather not know if I had breast cancer. |  |  |  |  |  |
| 5 | Getting breast cancer is a death sentence. There is not much that can be done when someone has breast cancer. |  |  |  |  |  |
| 6 | Talking to family/friends about symptoms of breast cancer is embarrassing. |  |  |  |  |  |

**Section D: Breast cancer practices and care seeking behaviours.**

Q28 Have you ever been screened for breast cancer?

Yes

No

Q29 Have you ever had a clinical breast exam by a nurse or doctor?

Yes

No

Q30 Have you ever had a mammogram or a breast ultrasound?

Yes

No

Q31 Have you ever examined your own breasts to feel for any lumps?

Yes

No

Q32 If yes, how often do you check your breasts?

At least once a week

At least once a month

At least once every 6 months

Rarely or Never

Q33 How confident are you that you would notice/detect lumps in your breasts?

Very confident

Fairly confident

Not at all confident

Q34 If you did notice lumps in your breasts how likely are you to seek medical care?

Very likely

Somewhat likely

Not sure

Somewhat unlikely

Very unlikely

Q35 If you had a question about your breast or noticed a lump or a change in your breasts, where is the first place you would go to get care?

Natural medicine practitioner or herbalist

A general practitioner (GP)

Nurse at a community health clinic

Specialist at a hospital

**Section E: Health Belief Model and Breast Cancer Screening.**

Instruction: For each statement, please indicate how much you agree or disagree with the following statements by putting a check in the box on the right side of each statement. There is no right or wrong answer.

| S/No  Q36 | **Susceptibility to Breast Cancer**  Please indicate how much you agree or disagree with the following statements. | **Strongly disagree** | **Disagree** | **Neutral** | **Agree** | **Strongly agree** |
| --- | --- | --- | --- | --- | --- | --- |
| 1 | It is extremely likely I will get breast cancer in the future. |  |  |  |  |  |
| 2 | I feel I will get breast cancer in the future. |  |  |  |  |  |
| 3 | There is a good possibility I will get breast cancer in the next 10 years. |  |  |  |  |  |
| 4 | My chances of getting breast cancer are great. |  |  |  |  |  |
| 5 | I am more likely than the average woman to get breast cancer. |  |  |  |  |  |

| S/No  Q37 | **Seriousness to Breast Cancer**  Please indicate how much you agree or disagree with the following statements. | **Strongly disagree** | **Disagree** | **Neutral** | **Agree** | **Strongly agree** |
| --- | --- | --- | --- | --- | --- | --- |
| 1 | The thought of breast cancer scares me. |  |  |  |  |  |
| 2 | When I think about breast cancer, my heart beats faster. |  |  |  |  |  |
| 3 | I am afraid to think about breast cancer. |  |  |  |  |  |
| 4 | Problems I would experience with breast cancer would last a long time. |  |  |  |  |  |
| 5 | Breast cancer would threaten a relationship with my boyfriend, husband, or partner. |  |  |  |  |  |
| 6 | If I had breast cancer my whole life would change. |  |  |  |  |  |
| 7 | If I developed breast cancer, I would not live longer than 5 years. |  |  |  |  |  |

| S/No  Q38 | **Benefits of Breast Self-Examination (BSE)**  Please indicate how much you agree or disagree with the following statements. | **Strongly disagree** | **Disagree** | **Neutral** | **Agree** | **Strongly agree** |
| --- | --- | --- | --- | --- | --- | --- |
| 1 | When I do breast self-examination I feel good about myself. |  |  |  |  |  |
| 2 | When I complete the monthly breast self-examination I don’t worry as much about breast cancer. |  |  |  |  |  |
| 3 | Completing breast self-examination each month will allow me to find lumps early. |  |  |  |  |  |
| 4 | If I complete breast self-examination monthly during the next year I will decrease my chance of dying from breast cancer. |  |  |  |  |  |
| 5 | If I complete breast self-examination monthly I will decrease my chances of requiring radical or disfiguring surgery if breast cancer occurs. |  |  |  |  |  |
| 6 | If I complete the monthly breast self-examination it will help me to find a lump which might be cancer before it is detected by a doctor or nurse. |  |  |  |  |  |

| S/No  Q39 | **Benefits of Benefits of Mammograms**  Please indicate how much you agree or disagree with the following statements. | **Strongly disagree** | **Disagree** | **Neutral** | **Agree** | **Strongly agree** |
| --- | --- | --- | --- | --- | --- | --- |
| 1 | When I get a recommended mammogram, I feel good about myself. |  |  |  |  |  |
| 2 | When I get a mammogram, I don’t worry as much about breast cancer. |  |  |  |  |  |
| 3 | Having a mammogram or x-ray of the breast will help me find lumps early. |  |  |  |  |  |
| 4 | Having a mammogram or x-ray of the breast will decrease my chances of dying from breast cancer |  |  |  |  |  |
| 5 | Having a mammogram or x-ray of the breast will decrease my chances of requiring radical or disfiguring surgery if breast cancer occurs. |  |  |  |  |  |
| 6 | Having a mammogram will help me find a lump before it can be felt by myself or a health professional. |  |  |  |  |  |

| S/No  Q40 | **Barriers to Breast Self-Examination (BSE)**  Please indicate how much you agree or disagree with the following statements. | **Strongly disagree** | **Disagree** | **Neutral** | **Agree** | **Strongly agree** |
| --- | --- | --- | --- | --- | --- | --- |
| 1 | I feel funny doing breast self-examination. |  |  |  |  |  |
| 2 | Doing breast self-examination during the next year will make me worry about breast cancer. |  |  |  |  |  |
| 3 | Breast self-examination will be embarrassing to me. |  |  |  |  |  |
| 4 | Doing breast self-examination will take too much time. |  |  |  |  |  |
| 5 | Doing breast self-examination will be unpleasant. |  |  |  |  |  |
| 6 | I don’t have enough privacy to do breast self-examination. |  |  |  |  |  |

| S/No  Q41 | **Barriers to undergoing a Mammogram**  Please indicate how much you agree or disagree with the following statements. | **Strongly disagree** | **Disagree** | **Neutral** | **Agree** | **Strongly agree** |
| --- | --- | --- | --- | --- | --- | --- |
| 1 | Having a routine mammogram or X-ray of the breast would make me worry about breast cancer |  |  |  |  |  |
| 2 | Having a mammogram or x-ray of the breast would be embarrassing |  |  |  |  |  |
| 3 | Having a mammogram or x-ray of the breast would take too much time |  |  |  |  |  |
| 4 | Having a mammogram or x-ray of the breast would be painful |  |  |  |  |  |
| 5 | Having a mammogram or x-ray of the breast would cost too much money |  |  |  |  |  |

| S/No  Q42 | **Confidence/Self-Efficacy**  Please indicate how much you agree or disagree with the following statements. | **Strongly disagree** | **Disagree** | **Neutral** | **Agree** | **Strongly agree** |
| --- | --- | --- | --- | --- | --- | --- |
| 1 | I know how to perform breast self-examination. |  |  |  |  |  |
| 2 | I am confident I can perform breast self-examination correctly. |  |  |  |  |  |
| 3 | If I were to develop breast cancer I would be able to find a lump by performing breast self-examination. |  |  |  |  |  |
| 4 | I am able to find a breast lump if I practice breast self-examination alone. |  |  |  |  |  |
| 5 | I am able to find a breast lump which is the size of a quarter or a R2 coin. |  |  |  |  |  |
| 6 | I am able to find a breast lump which is the size of a dime or a 10 cent coin. |  |  |  |  |  |
| 7 | I am able to find a breast lump which is the size of a pea. |  |  |  |  |  |
| 8 | I am sure of the steps to follow for doing breast self-examination. |  |  |  |  |  |
| 9 | I am able to identify normal and abnormal breast tissue when I do breast self-examination. |  |  |  |  |  |
| 10 | When looking in the mirror, I can recognize abnormal changes in my breast. |  |  |  |  |  |
| 11 | I can use the correct part of my fingers when I examine my breasts. |  |  |  |  |  |

| S/No  Q43 | **Health Motivation/Cues to Action**  Please indicate how much you agree or disagree with the following statements. | **Strongly disagree** | **Disagree** | **Neutral** | **Agree** | **Strongly agree** |
| --- | --- | --- | --- | --- | --- | --- |
| 1 | I want to discover health problems early. |  |  |  |  |  |
| 2 | Maintaining good health is extremely important to me. |  |  |  |  |  |
| 3 | I searched for new information to improve my health. |  |  |  |  |  |
| 4 | I feel it is important to carry out activities which will improve my health. |  |  |  |  |  |
| 5 | I eat well balanced meals. |  |  |  |  |  |
| 6 | I exercise at least 3 times a week. |  |  |  |  |  |
| 7 | I have regular health check-ups even with I am not sick. |  |  |  |  |  |

Thank you for participating in our survey. If you would like to learn more about breast cancer and screening, please visit the following resources:

https://www.cancer.org/cancer/breast-cancer.html

https://www.cancer.gov/types/breast/mammograms-fact-sheet

https://www.breastcancer.org

Any comments?
