# Supplementary material for: Comparative analysis of knowledge, attitudes, and breast cancer screening practices among women in South Africa and the United States: a multinational study
Source: Research Square preprint supplement (doi:10.21203/rs.3.rs-9151807/v1), 2026-04-25
Supplement: Supplementary file 2 [file 23113d5eb3ec64866bd1352a.xlsx]

## Sheet: Sheet1
Supplemental Table 1: Generalised ordered logistic regression analysis of factors associated with perceived attitude towards breast cancer screening in the health behavioural construct (n=2,000)
	Perceived Susceptibility			Perceived Seriousness			Benefits of BSE2			Benefits of mammography			Barriers to BSE			Barriers to mammography			Self-effecacy			Cues to action
Variables	AOR1	95% CI	P-value	AOR	95% CI	P-value	AOR	95% CI	P-value	AOR	95% CI	P-value	AOR	95% CI	P-value	AOR	95% CI	P-value	AOR	95% CI	P-value	AOR	95% CI	P-value
Country
USA	1 (ref)			1 (ref)			1 (ref)			1 (ref)			1 (ref)			1 (ref)			1 (ref)			1 (ref)
South Africa	0.86	0.71-1.03	0.11	0.76	0.63-0.92	0.005	1.75	1.43-2.14	<0.001	1.07	0.88-1.31	0.48	0.5	0.39-0.65	<0.001	0.93	0.76-1.14	0.487	1.33	1.10-1.60	0.003	1.23	1.02-1.49	0.029
Age group
35-44	1 (ref)			1 (ref)			1 (ref)			1 (ref)			1 (ref)			1 (ref)			1 (ref)			1 (ref)
45-54	1.13	0.90-1.43	0.3	0.9	0.71-1.15	0.41	1.06	0.83-1.37	0.634	0.98	0.76-1.27	0.896	0.67	0.50-0.89	0.006	0.79	0.62-1.01	0.064	0.87	0.68-1.10	0.23	1.07	0.84-1.35	0.592
55-70	1.13	0.88-1.46	0.34	0.93	0.72-1.21	0.6	1.21	0.92-1.59	0.163	1.39	1.06-1.83	0.017	0.61	0.45-0.84	0.003	0.75	0.58-0.99	0.04	0.81	0.63-1.04	0.1	1.32	1.02-1.70	0.033
Education
Primary/Secondary	1 (ref)			1 (ref)			1 (ref)			1 (ref)			1 (ref)			1 (ref)			1 (ref)			1 (ref)
Tertiary	0.96	0.80-1.14	0.62	0.93	0.78-1.11	0.4	1.02	0.84-1.23	0.858	1.28	1.06-1.54	0.011	1.11	0.88-1.40	0.382	1.04	0.86-1.26	0.685	1.09	0.92-1.30	0.33	1.47	1.23-1.76	<0.001
Employment
Unemployed	1 (ref)			1 (ref)			1 (ref)			1 (ref)			1 (ref)			1 (ref)			1 (ref)			1 (ref)
Part-time	1.03	0.76-1.39	0.86	1.07	0.79-1.46	0.65	0.99	0.71-1.37	0.933	0.99	0.72-1.37	0.955	1.71	1.18-2.49	0.005	1.31	0.95-1.80	0.104	0.86	0.63-1.16	0.32	1.51	1.11-2.05	0.009
Full-time	0.99	0.82-1.20	0.95	1.26	1.03-1.53	0.021	1.14	0.92-1.40	0.23	1.04	0.85-1.28	0.688	1.07	0.82-1.38	0.629	0.99	0.81-1.22	0.959	1.08	0.89-1.31	0.45	1.29	1.06-1.57	0.011
Prefer not to answer	0.33	0.08-1.32	0.12	1.94	0.51-7.44	0.33	1.04	0.22-4.83	0.96	0.33	0.07-1.64	0.177	2.65	0.63-11.26	0.185	0.55	0.12-2.52	0.437	0.54	0.14-2.15	0.38	1.26	0.29-5.45	0.762
Marital status
Single	1 (ref)			1 (ref)			1 (ref)			1 (ref)			1 (ref)			1 (ref)			1 (ref)			1 (ref)
Living with partner	1.03	0.83-1.28	0.77	1.13	0.91-1.41	0.28	0.97	0.76-1.22	0.779	1.11	0.88-1.40	0.388	1.14	0.86-1.51	0.35	1.45	1.14-1.83	0.002	1.05	0.84-1.13	0.67	0.88	0.70-1.09	0.241
Divorced	0.79	0.61-1.03	0.08	0.87	0.66-1.13	0.29	0.81	0.61-1.08	0.159	1.09	0.82-1.45	0.538	1.06	0.75-1.50	0.754	1.31	0.98-1.75	0.071	1.03	0.79-1.35	0.8	0.78	0.59-1.02	0.067
Widowed	1.27	0.88-1.84	0.2	0.93	0.64-1.34	0.68	0.8	0.54-1.19	0.266	0.93	0.63-1.38	0.728	0.85	0.50-1.42	0.525	1.3	0.87-1.93	0.2	0.94	0.66-1.35	0.76	0.87	0.60-1.27	0.469
Parity
None	1 (ref)			1 (ref)			1 (ref)			1 (ref)			1 (ref)			1 (ref)			1 (ref)			1 (ref)
1-2 children	0.78	0.62-0.97	0.029	1.11	0.88-1.40	0.36	1.05	0.83-1.34	0.673	1.13	0.89-1.43	0.333	0.89	0.67-1.18	0.428	0.65	0.51-0.83	<0.001	0.92	0.74-1.16	0.5	1.32	1.05-1.66	0.018
3+ children	0.8	0.62-1.04	0.1	1.07	0.83-1.39	0.61	1.23	0.93-1.62	0.15	1.03	0.78-1.36	0.832	0.7	0.50-0.98	0.04	0.61	0.46-0.80	<0.001	1.07	0.83-1.39	0.59	1.27	0.98-1.65	0.071
Family history of breast cancer
No	1 (ref)			1 (ref)			1 (ref)			1 (ref)			1 (ref)			1 (ref)			1 (ref)			1 (ref)
Yes	2.43	2.01-2.94	<0.001	1.23	1.02-1.48	0.032	1.02	0.83-1.24	0.877	1.01	0.83-1.23	0.93	1.22	0.96-1.55	0.109	0.99	0.81-1.21	0.903	1.18	0.98-1.42	0.09	1.01	0.84-1.22	0.902
Self-rated health status
Low	1 (ref)			1 (ref)			1 (ref)			1 (ref)			1 (ref)			1 (ref)			1 (ref)			1 (ref)
Moderate	0.96	0.74-1.25	0.77	1.04	0.79-1.37	0.78	1.19	0.89-1.60	0.24	1.19	0.89-1.58	0.233	1.02	0.73-1.42	0.918	0.97	0.73-1.29	0.84	0.98	0.75-1.27	0.86	1.38	1.05-1.82	0.02
High	0.69	0.51-0.94	0.021	0.93	0.68-1.28	0.66	1.61	1.15-2.26	0.006	1.2	0.86-1.68	0.286	0.95	0.63-1.43	0.82	0.82	0.58-1.14	0.233	1.58	1.16-2.16	0.004	2.5	1.81-3.44	<0.001
Mental health issues
None	1 (ref)			1 (ref)			1 (ref)			1 (ref)			1 (ref)			1 (ref)			1 (ref)			1 (ref)
Slightly/moderately affected	1.48	1.23-1.78	<0.001	1.82	1.51-2.20	<0.001	0.88	0.72-1.07	0.208	0.91	0.74-1.11	0.342	1.23	0.96-1.58	0.107	1.33	1.09-1.63	0.005	0.79	0.66-0.96	0.015	0.82	0.68-0.99	0.04
Severely affected	1.65	1.17-2.32	0.004	2.83	2.01-3.98	<0.001	0.76	0.53-1.10	0.142	0.9	0.63-1.28	0.551	1.43	0.94-2.16	0.092	1.87	1.31-2.67	0.001	0.82	0.58-1.14	0.23	0.56	0.40-0.80	0.001
Service availability - Clinical breast examination
Not available	1 (ref)			1 (ref)			1 (ref)			1 (ref)			1 (ref)			1 (ref)			1 (ref)			1 (ref)
Available	0.92	0.69-1.22	0.57	0.75	0.56-1.00	0.048	1.44	1.06-1.96	0.021	1.66	1.23-2.25	0.001	0.78	0.55-1.10	0.157	0.75	0.55-1.01	0.056	1.67	1.26-2.22	<0.001	1.52	1.14-2.02	0.004
Service availability - Mammography
Not available	1 (ref)			1 (ref)			1 (ref)			1 (ref)			1 (ref)			1 (ref)			1 (ref)			1 (ref)
Available	0.79	0.58-1.08	0.14	0.69	0.52-0.93	0.013	1.07	0.79-1.47	0.648	1.36	1.00-1.84	0.051	0.42	0.30-0.60	<0.001	0.39	0.29-0.53	<0.001	1.48	1.11-1.97	0.007	1.74	1.31-2.33	<0.001
Stigma
No	1 (ref)			1 (ref)			1 (ref)			1 (ref)			1 (ref)			1 (ref)			1 (ref)			1 (ref)
Yes	1.05	0.84-1.31	0.66	1.82	1.46-2.29	<0.001	1.73	1.37-2.20	<0.001	1.5	1.18-1.90	0.001	1.42	1.08-1.87	0.013	1.16	0.92-1.47	0.217	1.56	1.25-1.94	<0.001	1.84	1.47-2.31	<0.001
Knowledge
Low	1 (ref)			1 (ref)			1 (ref)			1 (ref)			1 (ref)			1 (ref)			1 (ref)			1 (ref)
Moderate	1.1	0.86-1.40	0.45	0.9	0.70-1.16	0.42	1.22	0.93-1.59	0.149	1.24	0.95-1.61	0.105	0.31	0.24-0.42	<0.001	0.55	0.42-0.71	<0.001	0.95	0.75-1.21	0.69	0.97	0.76-1.24	0.79
High	1.65	1.19-2.29	0.003	0.94	0.68-1.30	0.71	1.2	0.84-1.72	0.304	1.51	1.07-2.14	0.021	0.32	0.21-0.48	<0.001	0.44	0.31-0.63	<0.001	1.02	0.74-1.41	0.89	0.85	0.62-1.18	0.341
Abbreviations: 1AOR = adjusted odds ratio 2BSE= Breast Self-examination
